# Supplementary material for: Activation of the NALP3 inflammasome is triggered by low intracellular potassium concentration
Source: Springer Nature journal article supplement (doi:10.1038/sj.cdd.4402195), 2007-06-29
Supplement: 41418_2007_BF4402195_MOESM28_ESM.pdf [file 41418_2007_BF4402195_MOESM28_ESM.pdf]

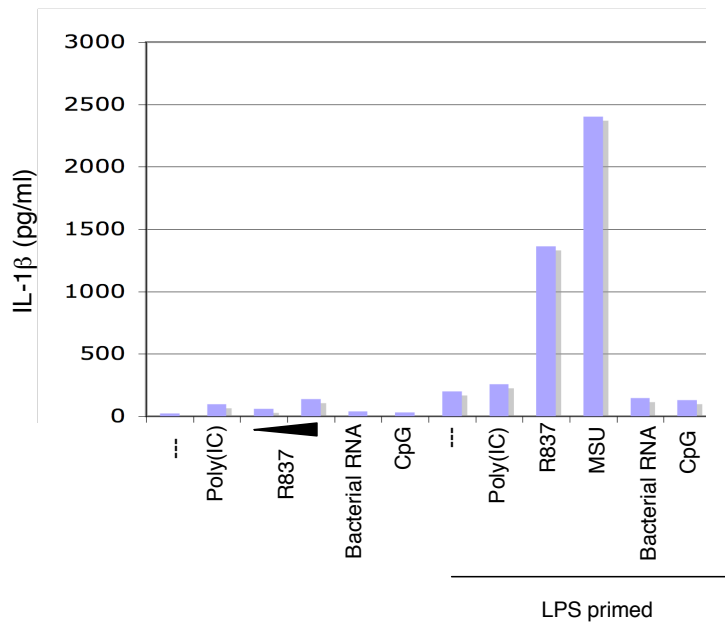

KCl (130mM)

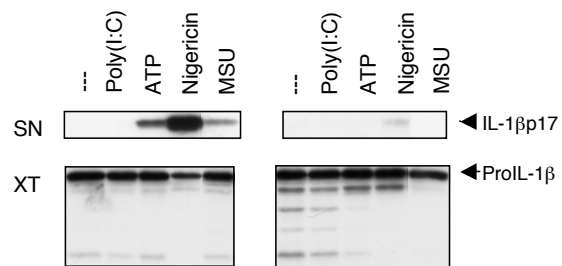

Supp. Fig. 1

**Supplementary Fig. 1**

Activation of murine WT macrophages by various reported NALP3 activators. (a) Cells, prestimulated or not with LPS, were incubated with various NALP3 candidate for 24 h. IL-1 $\beta$  secretion was assessed by ELISA. (b) WT murine macrophages were stimulated for 6h with the indicated NALP3 activators in the absence or presence of 130 mM extracellular K<sup>+</sup>. Supernatants were analysed by Western blot for IL-1 $\beta$  maturation.
